# Supplementary material for: Experimental Quantification of Long Distance Dispersal Potential of Aquatic Snails in the Gut of Migratory Birds
Source: PLOS journal article supplement (doi:10.1371/journal.pone.0032292), 2012-03-05
Supplement: S2 (10.1371/journal.pone.0032292.s002) [file journal.pone.0032292.s002]

## Experimental quantification of long distance dispersal potential of aquatic snails in the gut of migratory birds

Casper H.A. van Leeuwen, Gerard van der Velde, Bart van Lith & Marcel Klaassen

### Supporting Information

Table S2: The number of intact, damaged and viable snails retrieved after 24 hours for the two experiments combined.

| Species                                          | Snails ingested        | Damaged shells<br>(average $\pm$ 95%CI) | Intact shells<br>(average $\pm$ 95%CI) | Viable snails<br>(average $\pm$ 95%CI) |
|--------------------------------------------------|------------------------|-----------------------------------------|----------------------------------------|----------------------------------------|
| <i>Hydrobia (Peringia) ulvae</i>                 | 12×200 + 14×300 = 6600 | 11.4 ( $\pm$ 7.0): 4.33%                | 11.2 ( $\pm$ 8.5): 4.23%               | 0.8 ( $\pm$ 1.2): 0.32%                |
| <i>Potamopyrgus antipodarum</i>                  | 12×200 + 14×300 = 6600 | 4.8 ( $\pm$ 3.6): 1.88%                 | 13.9 ( $\pm$ 10.7): 5.47%              | -                                      |
| <i>Potamopyrgus antipodarum</i><br>+ macrophytes | 14×150 = 2100          | 0.8 ( $\pm$ 0.5): 0.52%                 | 5.3 ( $\pm$ 3.7): 3.52%                | -                                      |
| <i>Bithynia leachii</i>                          | 12×100 = 1200          | -                                       | 1.0 ( $\pm$ 1.3): 1.0%                 | -                                      |
| <i>Bathyomphalus contortus</i>                   | 12×100 = 1200          | -                                       | -                                      | -                                      |
